# Supplementary material for: Ascitic fluid shear stress in concert with hepatocyte growth factor drive stemness and chemoresistance of ovarian cancer cells via the c-Met-PI3K/Akt-miR-199a-3p signaling pathway
Source: PubMed Central journal article supplement (PMC9177676; doi:10.1038/s41419-022-04976-6), 2022-06-08

This file contains original data of Western Blot in the manuscript. The images were obtained as .tif files using Bio-Rad ChemiDoc Imaging System

Figure 3b

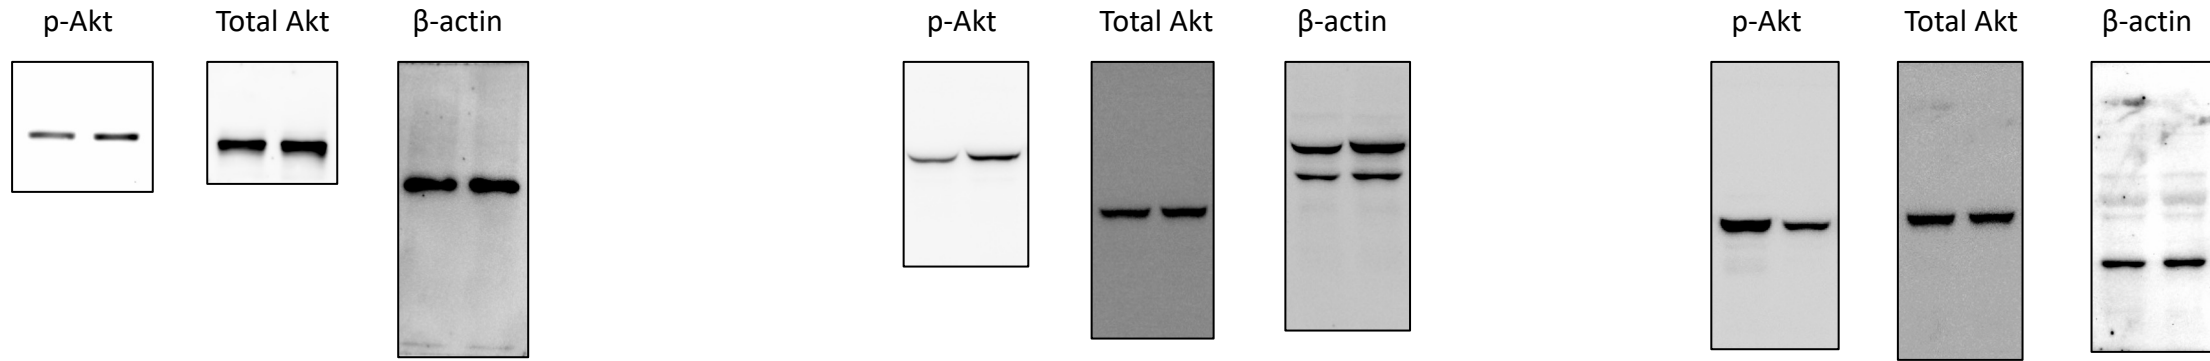

Figure 3d

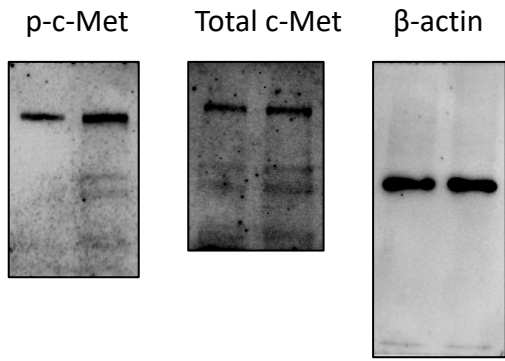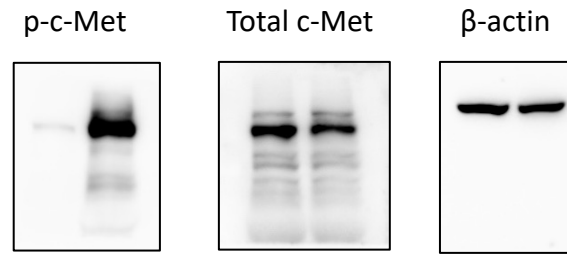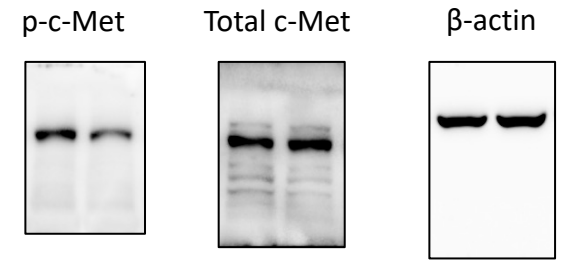

Figure 3f

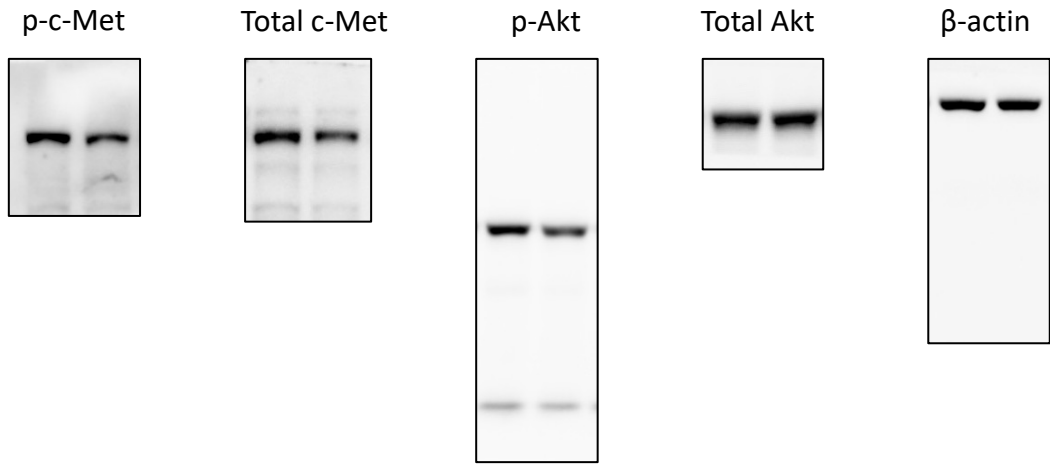

Supplement: 41419_2022_4976_MOESM2_ESM.pdf [file 41419_2022_4976_MOESM2_ESM.pdf]
